# Supplementary material for: Targeting endogenous kidney regeneration using anti-IL11 therapy in acute and chronic models of kidney disease
Source: PubMed Central journal article supplement (PMC9723120; doi:10.1038/s41467-022-35306-1), 2022-12-05

## Supplementary Materials for

### Targeting endogenous kidney regeneration using anti-IL11 therapy in acute and chronic models of kidney disease

**Authors:** Anissa A. Widjaja<sup>1\*</sup>, Sivakumar Viswanathan<sup>1</sup>, Shamini G. Shekeran<sup>1</sup>, Eleonora Adami<sup>1,2</sup>, Wei-Wen Lim<sup>1,3</sup>, Sonia Chothani<sup>1</sup>, Jessie Tan<sup>3</sup>, Joyce Goh Wei Ting<sup>1</sup>, Chen Hui Mei<sup>1</sup>, Sze Yun Lim<sup>1</sup>, Carine M Boustany-Kari<sup>4</sup>, Julie Hawkins<sup>4</sup>, Enrico Petretto<sup>1</sup>, Norbert Hubner<sup>2,5,6</sup>, Sebastian Schafer<sup>1</sup>, Thomas M. Coffman<sup>1</sup>, Stuart A. Cook<sup>1,3,7\*</sup>

\*Corresponding author. Email: [anissa.widjaja@duke-nus.edu.sg](mailto:anissa.widjaja@duke-nus.edu.sg) and [stuart.cook@duke-nus.edu.sg](mailto:stuart.cook@duke-nus.edu.sg)

#### **This file includes:**

Supplementary Figures (1-12)

Supplementary Table 1

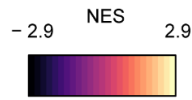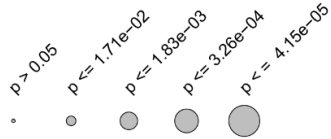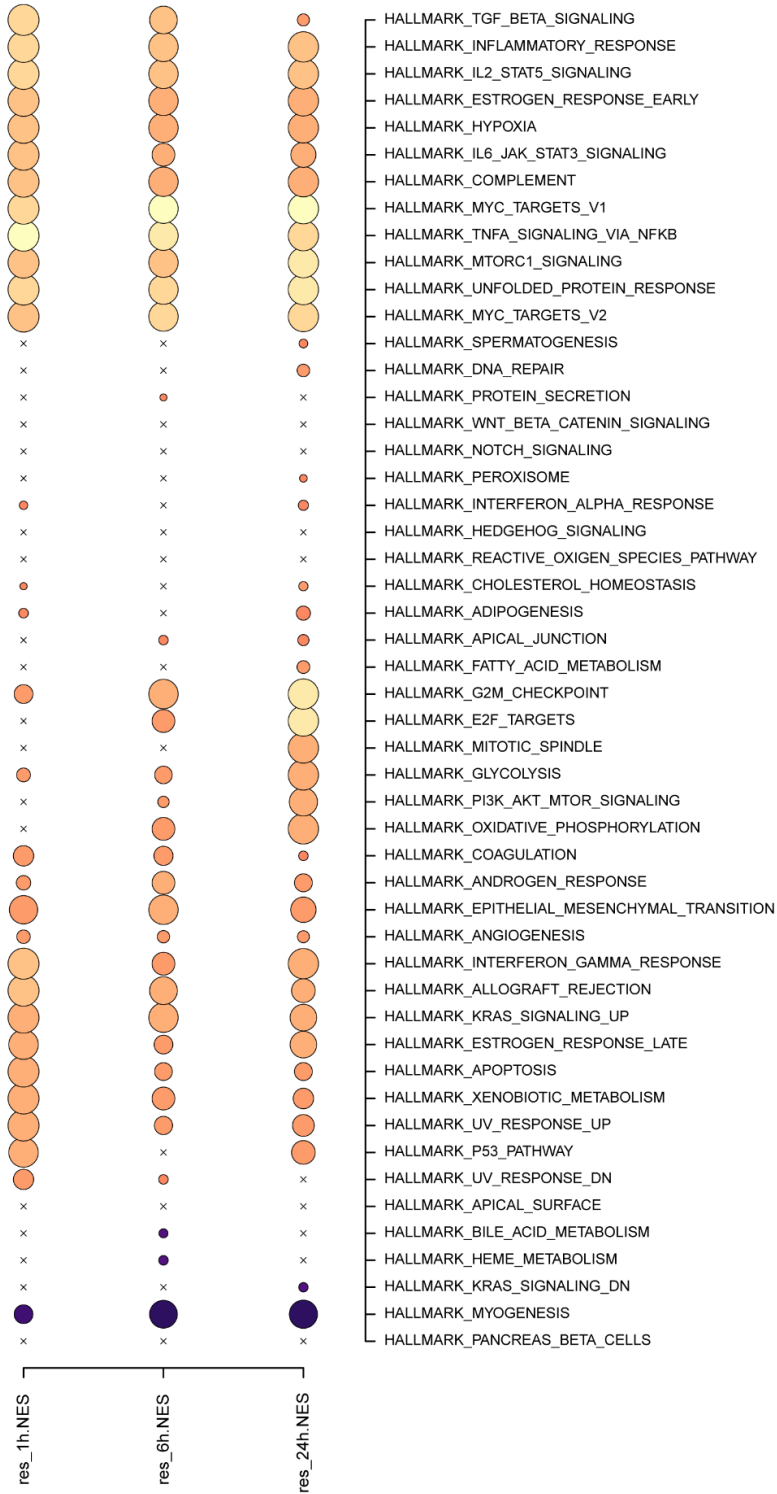

**Supplementary Figure 1: IL11 induces pro-inflammatory and epithelial-to-mesenchymal transcriptional responses in human tubular epithelial cells.** Bubblemap showing results of hallmark gene set enrichment analysis for differentially expressed genes following IL11 stimulation over a time course (0, 1, 6, and 24 hours). Normalized enrichment scores for the hallmark gene sets were quantified using the fgsea R package with the fgsea-multilevel method that is based on an adaptive multilevel splitting Monte-Carlo approach. The quantified significance level was corrected using the Benjamini & Hochberg method. Normalized enrichment scores (NES) are represented by colors, from black (negative NES, suggesting down-regulation of the gene set) to yellow (positive NES, suggesting up-regulation). Dot size indicates significance, the larger the dot, the lower the adjusted p-value. Gene sets for the enrichment test were selected from the “H - Hallmark” collection in MSigDB. Source data are provided as a Source Data file.

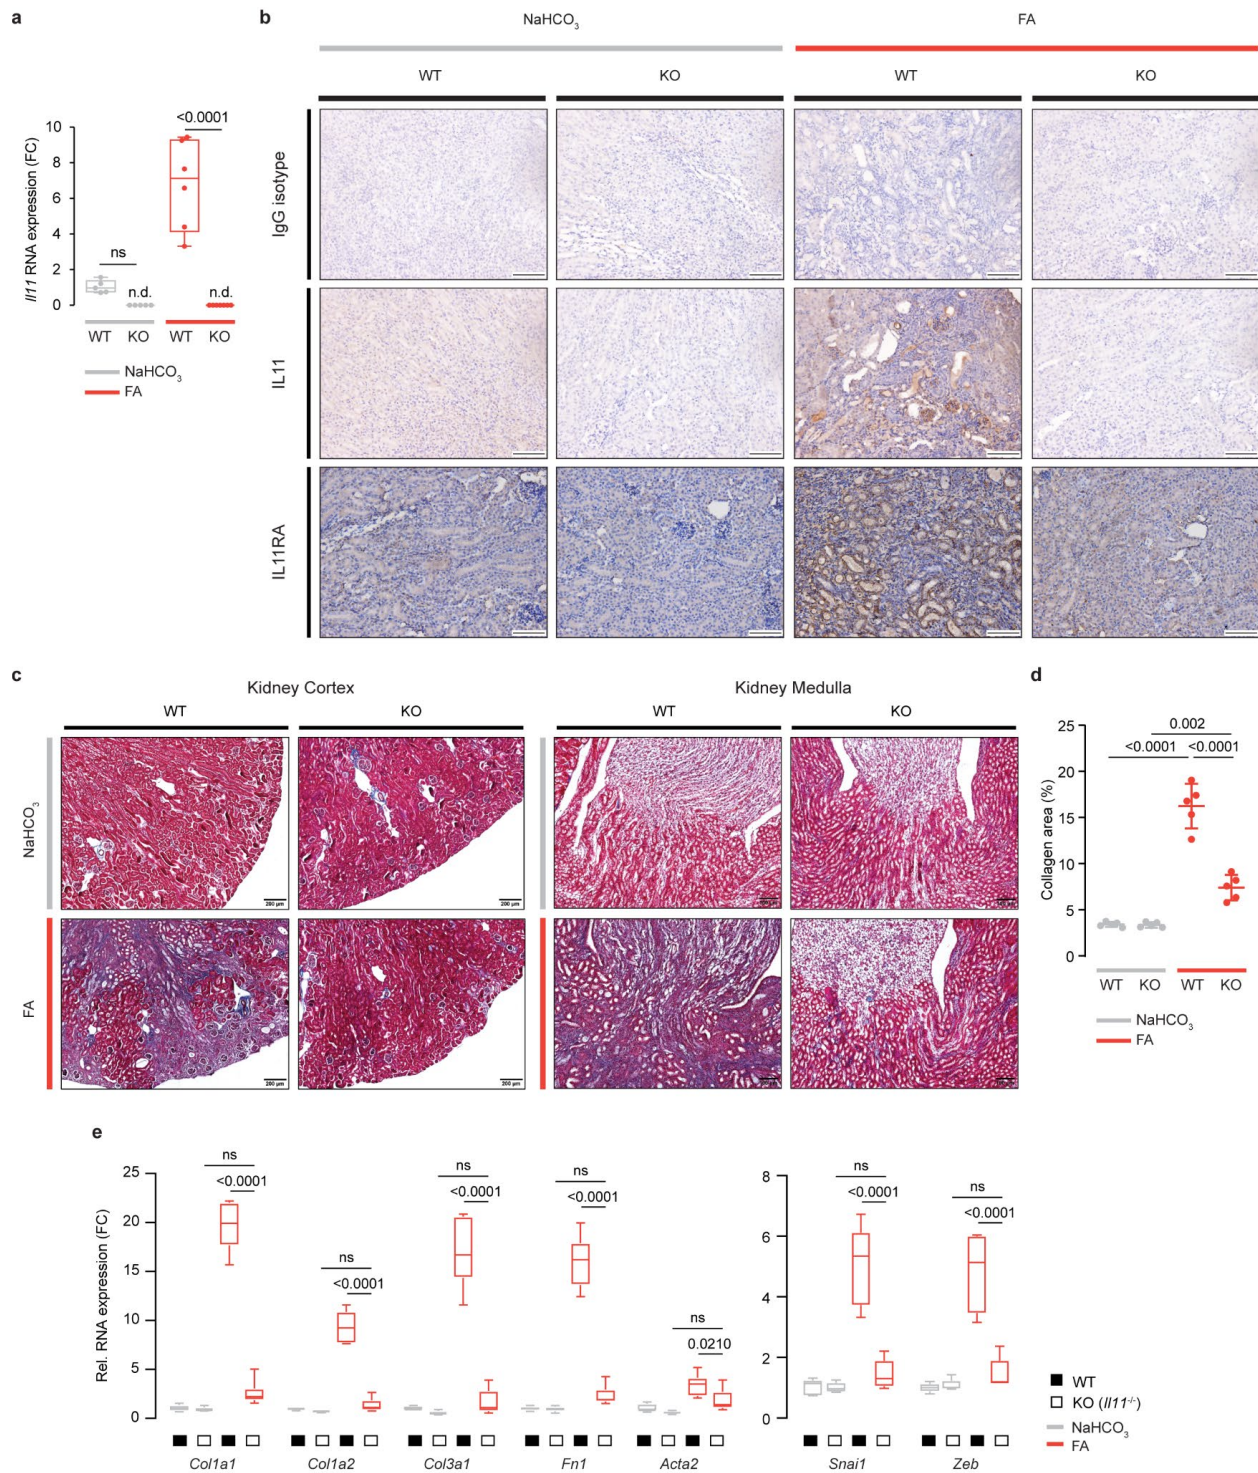

**Supplementary Figure 2: *//11* knockout mice are protected from renal inflammation and fibrosis. a** Renal *//11* RNA expression, **b** representative immunohistochemistry staining images of kidney stained for IL11 (with X203), IL11RA (with X209); staining with an IgG isotype control (11E10) is provided as negative control (representative dataset from  $n=3$ /group; scale bars: 100  $\mu\text{m}$ ), **c** representative Masson's Trichrome images of kidney cortex (scale bars: 200  $\mu\text{m}$ ) and medulla (scale bars: 100  $\mu\text{m}$ ) (representative dataset from  $n=5$ /group), **d** quantification of collagen area from Masson's Trichrome-stained kidney sections ( $n=5$ /group), **e** relative renal mRNA expression of fibrotic markers (*Col1a1*, *Col1a2*, *Col3a1*, *Fn1*,

*Acta2*), pro-inflammatory markers (*Tnfa*, *Il6*, *Ccl2*, *Ccl5*, *Il1β*), and pEMT markers (*Snai1*, and *Zeb*) from control and *Il11* KO mice post FA (Schematic Fig. 2a). **a**, **e** Data are shown as box-and-whisker with median (middle line), 25th–75th percentiles (box), and minimum-maximum values (whiskers); WT-NaHCO<sub>3</sub>, *Il11*<sup>-/-</sup>-NaHCO<sub>3</sub> (n=5/group), WT-FA (n=6), *Il11*<sup>-/-</sup>-FA (n=7), **c** data are shown as mean±SD. **a**, **d**, **e** 2-way ANOVA with Sidak's correction. FC: Fold change. Source data are provided as a Source Data file.

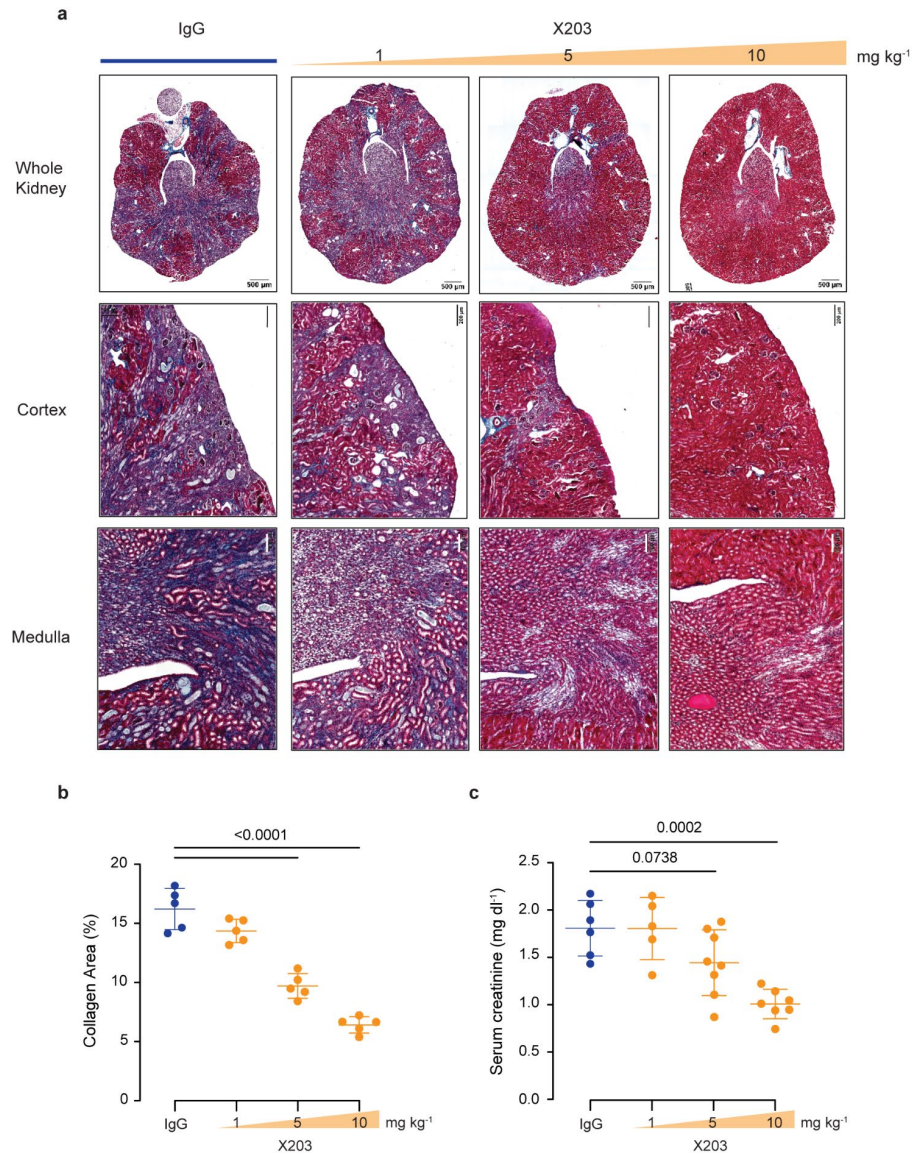

**Supplementary Figure 3: Dose-dependent effects of anti-IL11 on renal fibrosis and function. a**

Representative Masson's Trichrome images of whole kidney cross section (scale bars: 500 μm), kidney cortex (scale bars: 200 μm), and kidney medulla (scale bars: 100 μm) (representative dataset from n=5/group), and **b** quantification of collagen area from Masson's Trichrome-stained kidney sections (n=5/group), **c** serum creatinine for X203 dose finding experiments, as compared to IgG (10 mg/kg), as represented in Schematic Fig. 3a (IgG (n=6), X203 1 mg/kg (n=5), X203 5 mg/kg (n=8), X203 10 mg/kg (n=7)). **b, c** Data are shown as mean±SD, one-way ANOVA with Dunnett's correction. Source data are provided as a Source Data file.

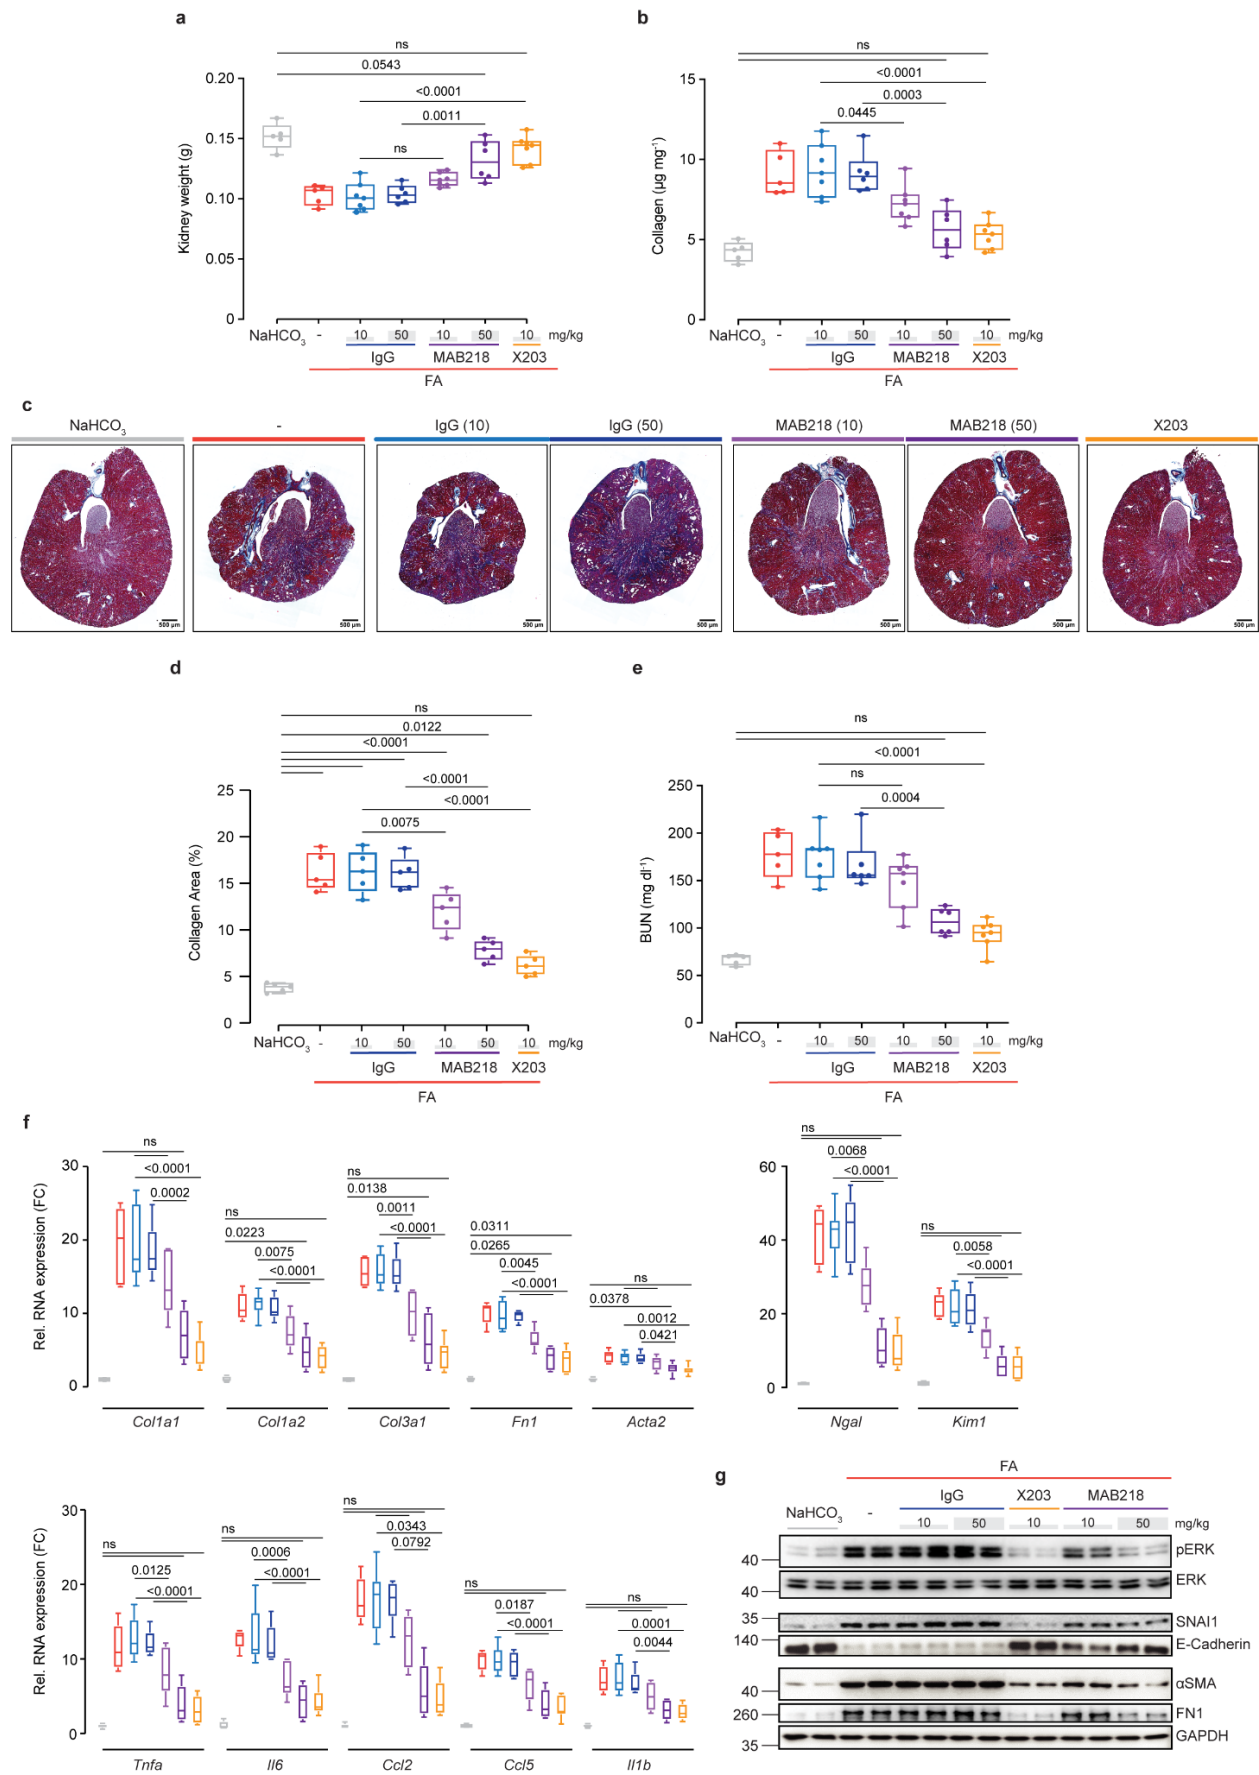

**Supplementary Figure 4: Therapeutic effects of two separate IL11 neutralizing antibodies (X203 and MAB218) on renal phenotypes following folic acid-induced nephrotoxicity.** **a** Kidney weight, **b** kidney collagen content by hydroxyproline assay, **c** representative Masson's Trichrome images of whole kidney cross section (scale bars: 500  $\mu$ m, representative dataset from n=5/group), **d** quantification of collagen area from Masson's Trichrome-stained kidney sections (n=5/group), **e** BUN, **f** relative renal mRNA expression of *Col1a1*, *Col1a2*, *Col3a1*, *Fn1*, *Acta2*, *Ngal*, *Kim1*, *Tnfa*, *Il6*, *Ccl2*, *Ccl5*, and *Il1 $\beta$*  (n=5-7/group), and **g** Western blots of pERK, ERK, SNAI1, E-Cadherin,  $\alpha$ SMA, Fibronectin, and GAPDH (representative dataset from n=5/group) for X203 and MAB218 therapeutic comparison experiments as shown in Schematic Fig. 3d. **a, b, e, f** NaHCO<sub>3</sub>, FA (n=5/group), IgG/MAB218/X203 (10 mg/kg) (n=7/group), IgG/MAB218 (50 mg/kg) (n=6/group). **a, b, d-f** Data are shown as box-and-whisker with median (middle line), 25th–75th percentiles (box), and minimum-maximum values (whiskers), one-way ANOVA with Tukey's correction except for (**f**, *Ccl2*) which was analyzed by Kruskal-Wallis with Dunn's correction. Source data are provided as a Source Data file.



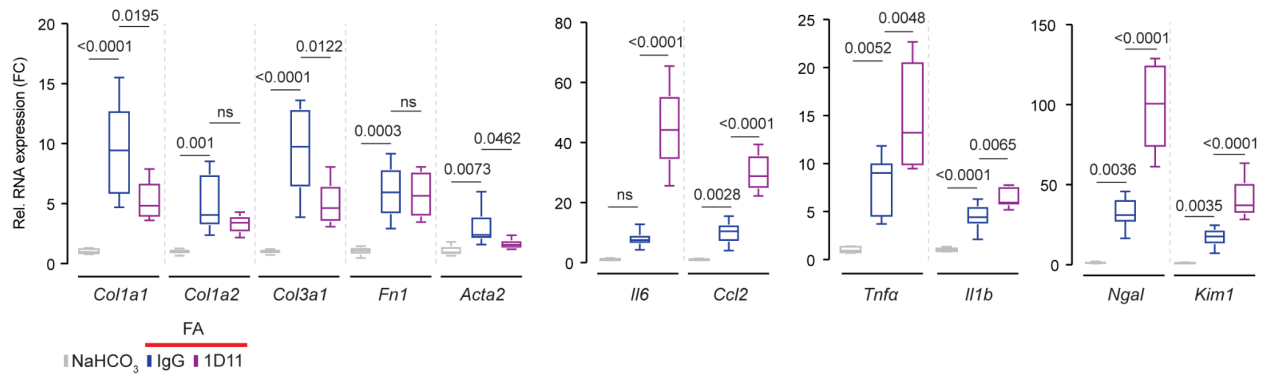

**Supplementary Figure 5: Markers of fibrosis, inflammation, and kidney damage in injured kidneys of mice receiving anti-TGFβ (1D11) treatment.** Relative renal mRNA expression levels of fibrosis (*Col1a1*, *Col1a2*, *Col3a1*, *Fn1*, *Acta2*), pro-inflammatory (*Tnfa*, *Il6*, *Ccl2*, *Il1β*), and kidney injury (*Ngal*, *Kim1*) markers for experiments illustrated in Schematic Fig. 3f (NaHCO<sub>3</sub> (n=4), FA+IgG (n=10), FA+1D11 (n=6)). Data are shown as box-and-whisker with median (middle line), 25th–75th percentiles (box), and minimum-maximum values (whiskers), one-way ANOVA with Tukey's correction. Source data are provided as a Source Data file.

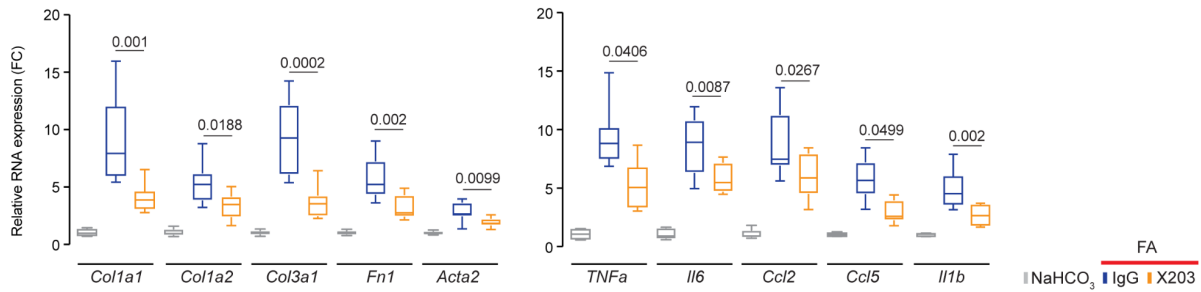

**Supplementary Figure 6: Markers of fibrosis and inflammation in the kidneys of mice subjected to folic acid induced renal injury and given X23 in a treatment mode.** Relative renal mRNA expression of *Tnfa*, *Il6*, *Ccl2*, *Ccl5*, *Il1 $\beta$* , *Col1a1*, *Col1a2*, *Col3a1*, *Fn1*, and *Acta2* for X23 therapeutic dosing experiments as illustrated in Schematic Fig. 4a (NaHCO<sub>3</sub> (n=5), FA+IgG (n=9), FA+X23 (n=8)). Data are shown as box-and-whisker with median (middle line), 25th–75th percentiles (box), and minimum–maximum values (whiskers), one-way ANOVA with Tukey’s correction except for (*Tnfa*, *Ccl5*) which were analyzed by Kruskal-Wallis with Dunn’s correction. Source data are provided as a Source Data file.

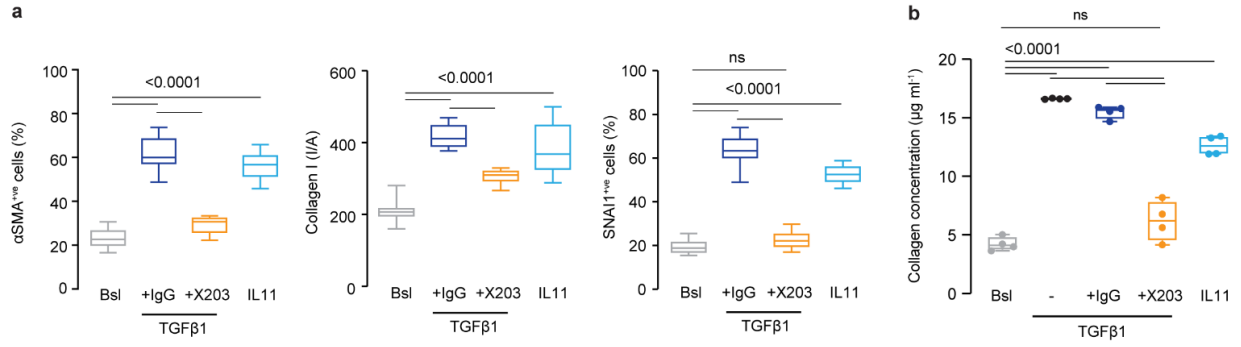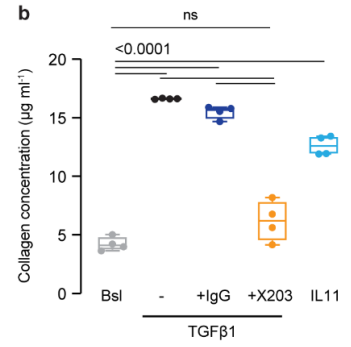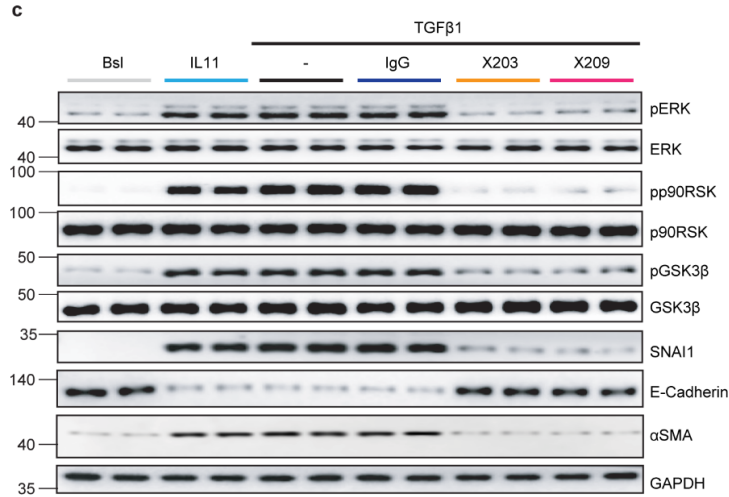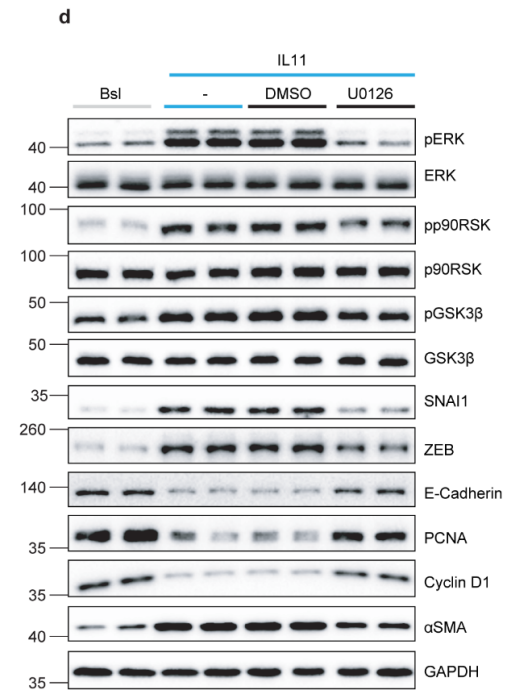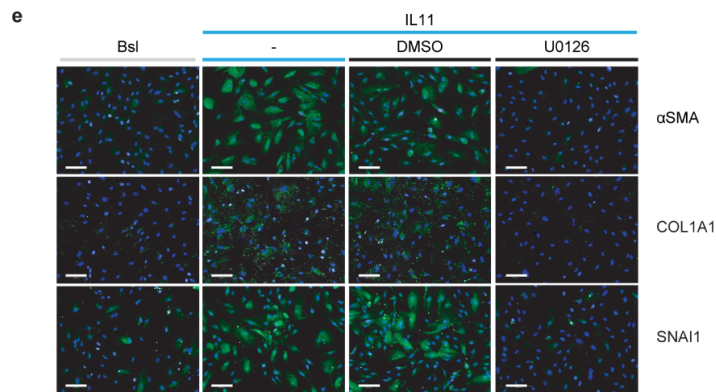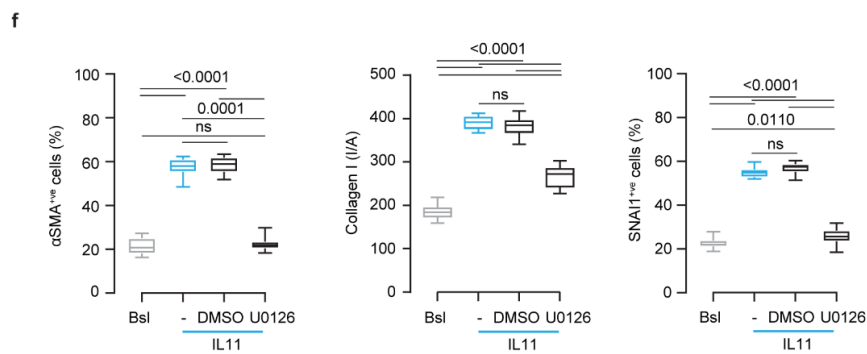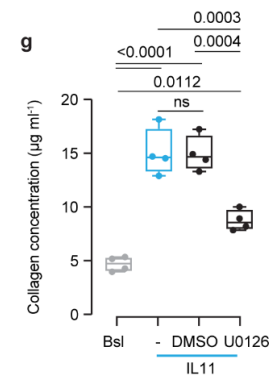

**Supplementary Figure 7: X203 inhibits TEC mesenchymal transition in an ERK dependent manner.**

**a** Quantification of  $\alpha$ SMA<sup>+ve</sup> and SNAI1<sup>+ve</sup> cells and Collagen 1 immunostaining (n=14/group) and **b** collagen secretion in the supernatant (n=4/group) from TECs stimulated with either IL11 or TGF $\beta$  in the presence of IgG/X203. **c** Western blots of pERK, ERK, pp90RSK, p90RSK, pGSK3 $\beta$ , GSK3 $\beta$ , SNAI1, E-Cadherin, and GAPDH for TECs stimulated with either IL11 or TGF $\beta$  in the presence of IgG, X203 (anti-IL11), or X209 (anti-IL11RA) (representative dataset from n=4/group). **d** Western blots of pERK, ERK, pp90RSK, p90RSK, pGSK3 $\beta$ , GSK3 $\beta$ , SNAI1, ZEB, E-Cadherin, PCNA, Cyclin D1,  $\alpha$ SMA, and GAPDH (representative dataset from n=4/group), **e** representative IF images (scale bars: 100  $\mu$ m, representative dataset from n=3/group) and **f** quantification of  $\alpha$ SMA<sup>+ve</sup> and SNAI1<sup>+ve</sup> cells (n=14/group) and Collagen 1 immunostaining (n=21/group) for TECs stimulated with IL11 alone or in the presence of either DMSO or U0126. **g** Collagen secretion in the supernatant (n=4/group) from bsl, IL11, IL11+DMSO, and IL11+U0126 group. **a-g** IL11 (5 ng/ml), TGF $\beta$ 1 (5 ng/ml), IgG/X203/X209 (2  $\mu$ g/ml), U0126 (10  $\mu$ M); 24-hour stimulation. **a, b, f, g** Data are shown as box-and-whisker with median (middle line), 25th–75th percentiles (box), and minimum-maximum values (whiskers), one-way ANOVA with Tukey's correction (except for F,  $\alpha$ SMA<sup>+ve</sup> which was analyzed by Kruskal-Wallis with Dunn's correction). Bsl: Baseline; I/A: Intensity/Area. Source data are provided as a Source Data file.

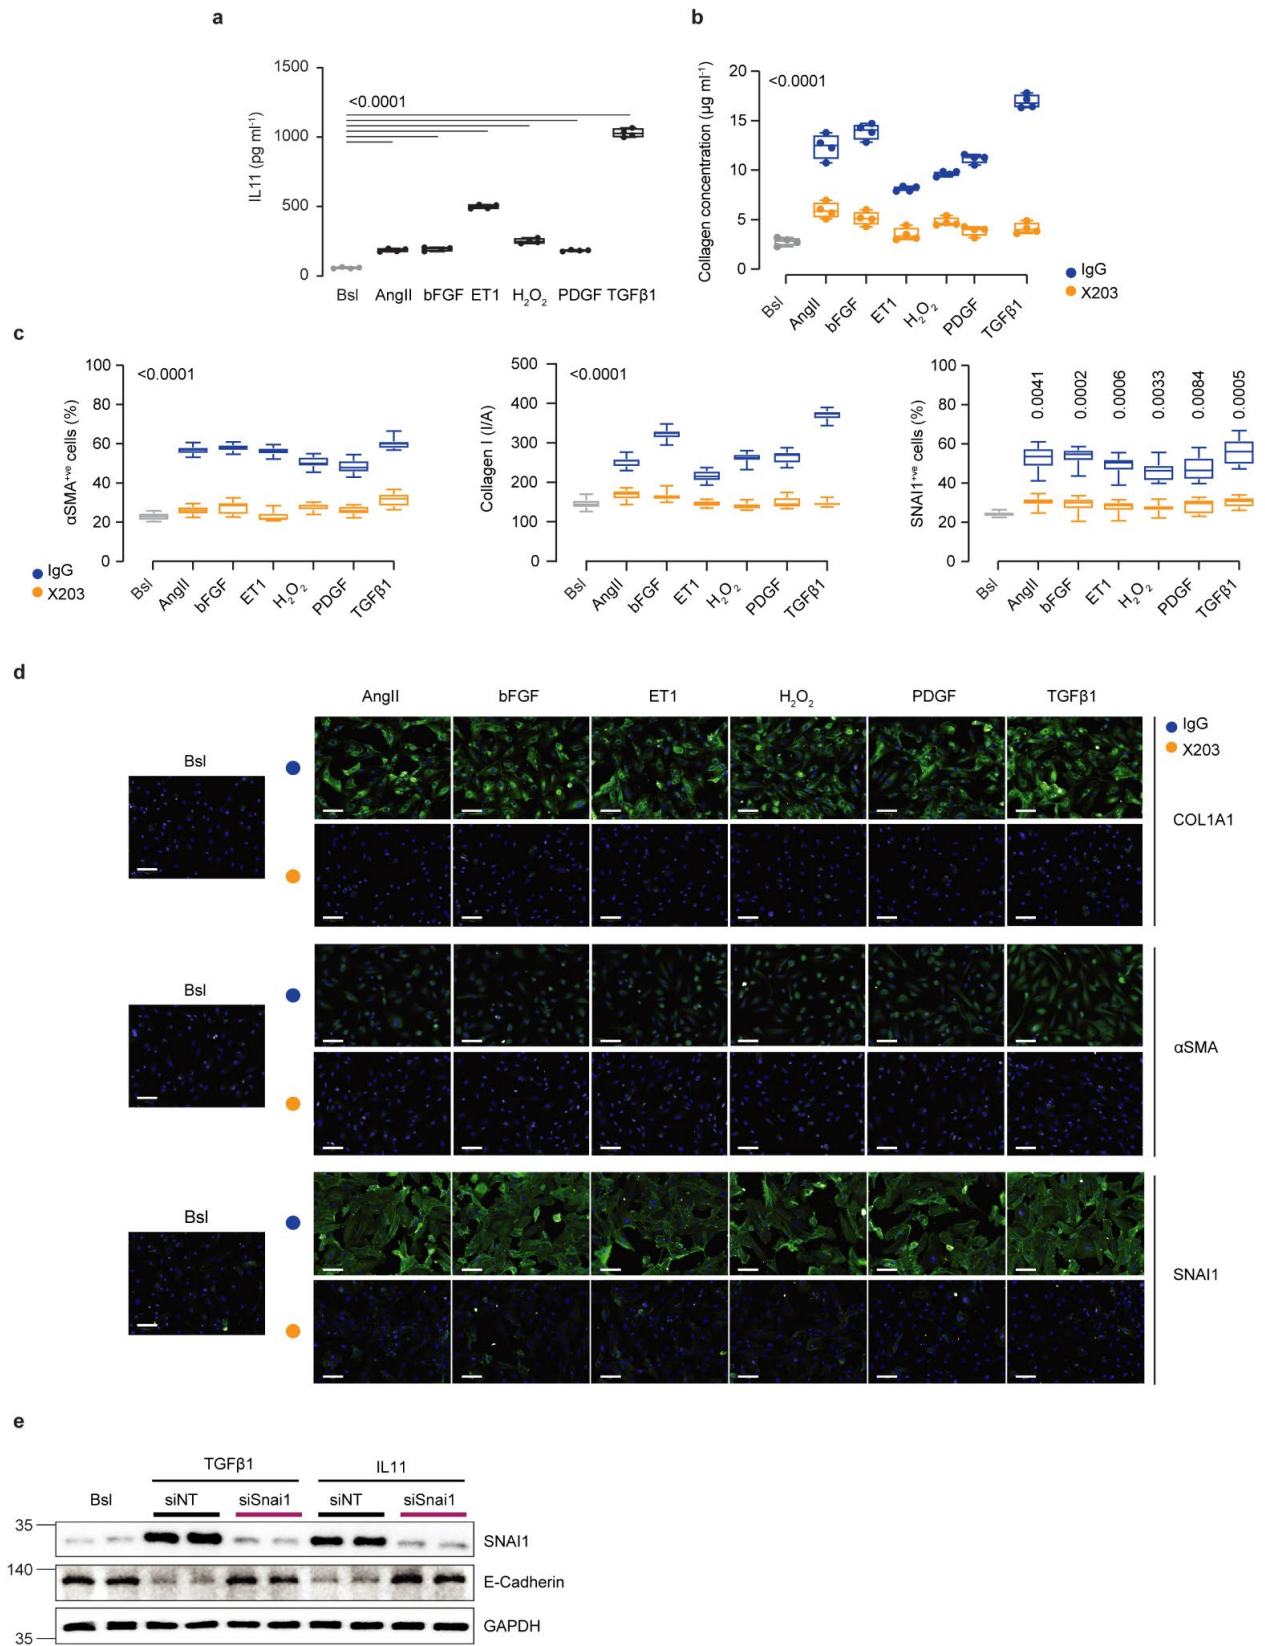

**Supplementary Figure 8: IL11 signaling is required for induction of pEMT in TECs.** **a** ELISA of secreted IL11 (n=4/group), **b** the amount of secreted collagen in the supernatant (n=4/group), **c** quantification (n=14/group), and **d** representative IF images (scale bars: 100  $\mu$ m, representative dataset from n=3/group) of  $\alpha$ SMA<sup>+ve</sup> and SNAI1<sup>+ve</sup> cells and Collagen 1 immunostaining from TECs after 24-hour treatment with Angiotensin II (AngII), basic FGF (bFGF), Endothelin-1 (ET-1), H<sub>2</sub>O<sub>2</sub>, PDGF, and TGF $\beta$ . **e** Western blots of SNAI1, E-Cadherin, and GAPDH from TECs stimulated with TGF $\beta$  or IL11 subjected to siRNA knockdown for SNAI1 (NT: non targeting siRNA control) (representative dataset from n=4/group). **a-e** TGF $\beta$ 1 (5 ng/ml), IL11 (5 ng/ml), AngII (100 nM), bFGF (10 ng/ml), Endothelin 1 (ET-1, 250 ng/ml), H<sub>2</sub>O<sub>2</sub> (0.2 mM), PDGF (20 ng/ml), IgG/X203/(2  $\mu$ g/ml), siNT/siSNAI1 (25 nM); 24-hour stimulation. **a-c** Data are shown as box-and-whisker with median (middle line), 25th–75th percentiles (box), and minimum-maximum values (whiskers). **a** One-way ANOVA with Dunnett's correction; **b,c** one-way ANOVA with Tukey's correction (except for C, SNAI1<sup>+ve</sup> which was analyzed by Kruskal-Wallis with Dunn's correction). Bsl: Baseline; I/A: Intensity/Area. Source data are provided as a Source Data file.

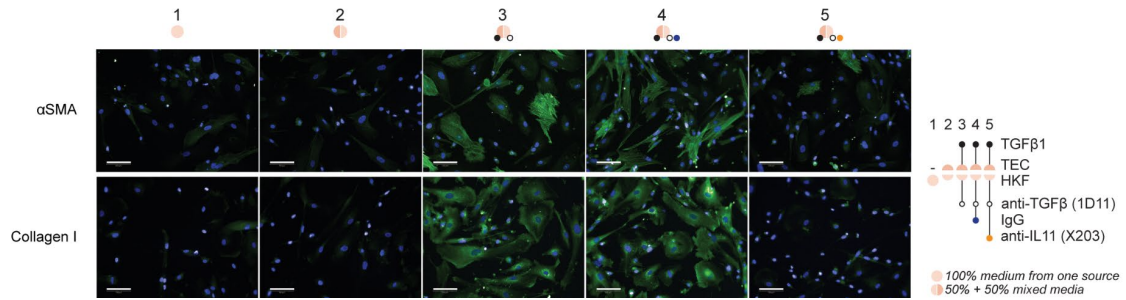

**Supplementary Figure 9: Paracrine IL11 (but not TGFβ) activity from TECs causes renal fibroblast-to-myofibroblast transition.** Representative images (scale bars: 100 μm, representative dataset from n=3/group) of αSMA<sup>+ve</sup> cells and Collagen 1 immunostaining from media transfer experiments in which conditioned media from control or TGFβ-stimulated TECs (24 hours) were used to treat primary human kidney fibroblasts (HKFs) in the presence of anti-TGFβ (1D11) alone or with either IgG or X203 as shown by the schematic on the right. Source data are provided as a Source Data file.

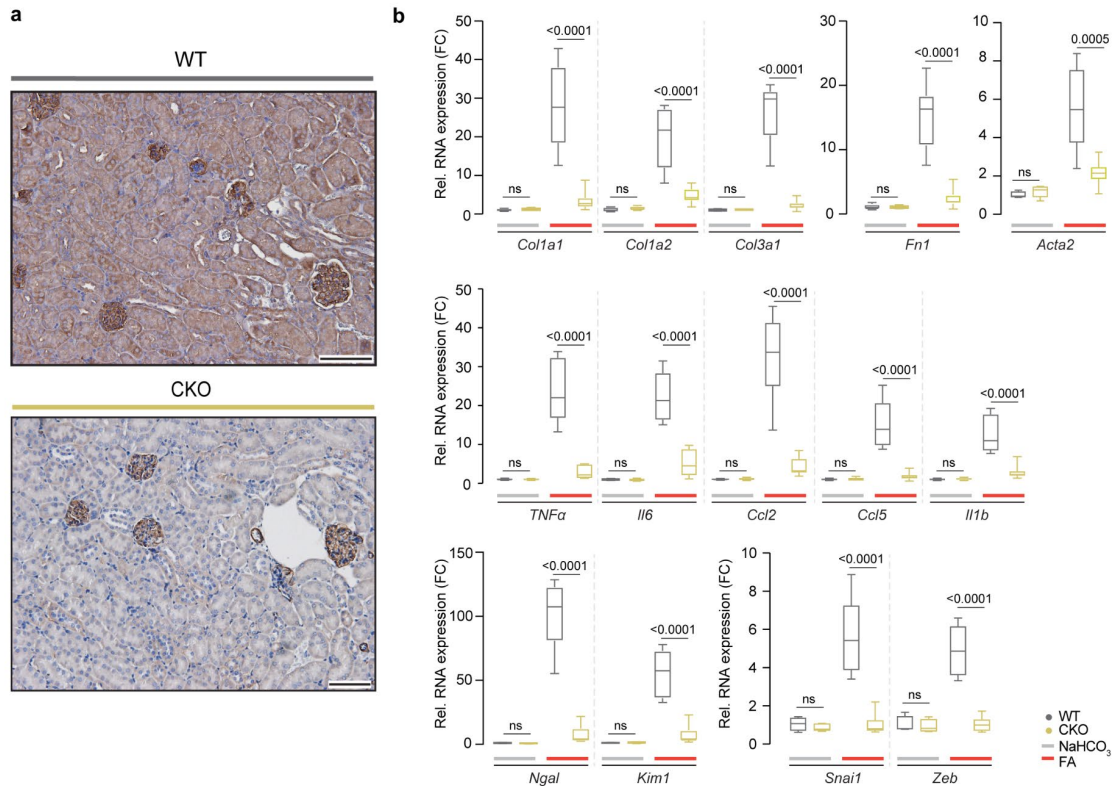

**Supplementary Figure 10: Mice with TEC-specific *Il11ra1* deletion are protected from fibrosis, inflammation and tubule damage following AKI. a** Representative immunohistochemistry images of IL11RA staining in kidneys from wild-type (WT) and TEC-specific *Il11ra1*-deleted (CKO) mice (scale bars: 100  $\mu$ m; representative dataset from n=3/group). **b** Relative renal mRNA expression levels of fibrotic markers (*Col1a1*, *Col1a2*, *Col3a1*, *Fn1*, *Acta2*), kidney injury markers (*Ngal*, *Kim1*), pro-inflammatory markers (*Tnfa*, *Il6*, *Ccl2*, *Ccl5*, *Il1 $\beta$* ), and pEMT markers (*Snai1*, *Zeb*) for experiments shown in Schematic Fig. 7a (WT-NaHCO<sub>3</sub> (n=4), CKO-NaHCO<sub>3</sub> (n=5), WT-FA (n=8), CKO-FA (n=7)). Data are shown as box-and-whisker with median (middle line), 25th–75th percentiles (box), and minimum-maximum values (whiskers), 2-way ANOVA with Sidak's correction. Source data are provided as a Source Data file.



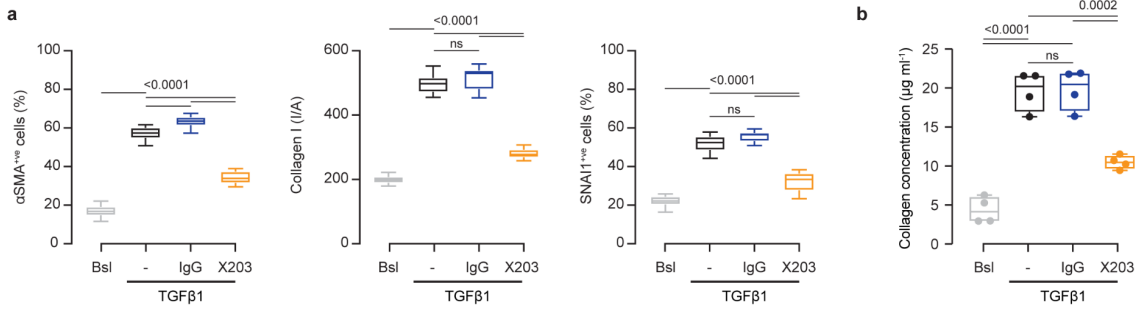

**Supplementary Figure 11: Inhibition of IL11 signaling reverts TECs that were in mesenchymal state back to an epithelial phenotype.** Quantification of **a** αSMA<sup>+</sup>ve and SNAI1<sup>+</sup>ve cells and Collagen 1 immunostaining (n=14/group), and **b** collagen secretion in the supernatant from TEC reversal experiments as shown in Schematic Fig. 6a. Data are shown as box-and-whisker with median (middle line), 25th–75th percentiles (box), and minimum-maximum values (whiskers), one-way ANOVA with Tukey's correction. Source data are provided as a Source Data file.

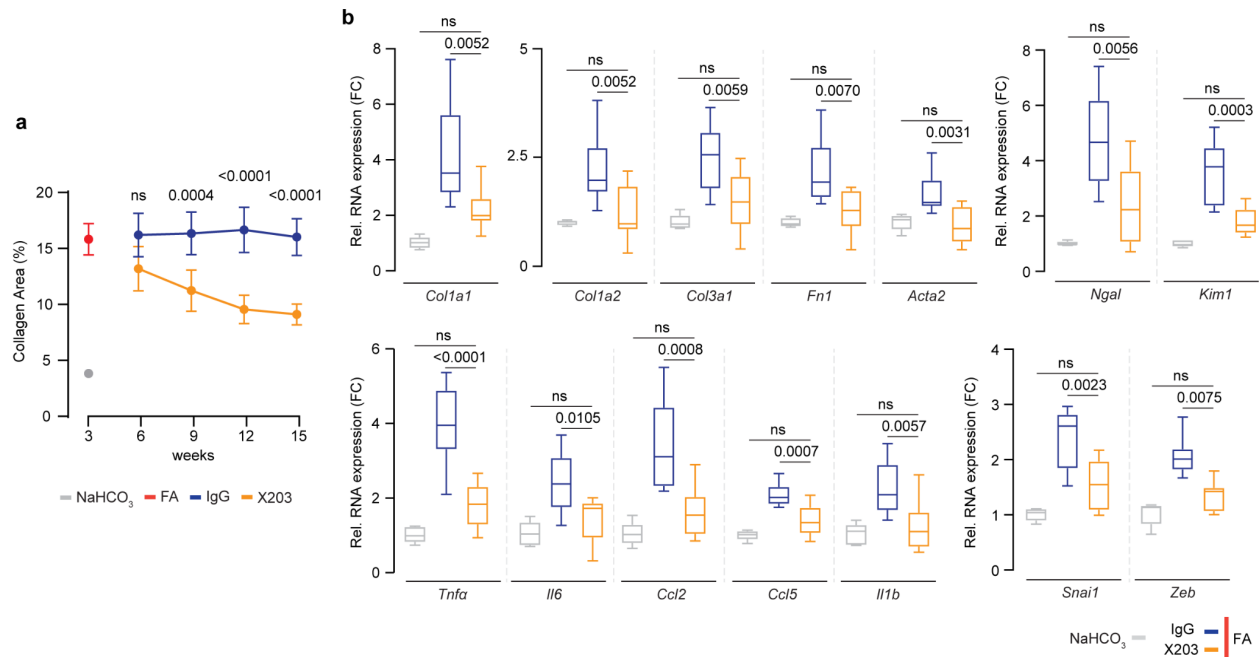

**Supplementary Figure 12: X203 reverses pEMT-driven renal fibrosis, inflammation, and parenchymal damage in mice with chronic kidney disease.** **a** Quantification of collagen area from Masson's Trichrome-stained kidney sections (n=4/group for kidneys collected at week 6, 9, and , n=5/group from those collected at other time points). Data are shown as mean  $\pm$  SD; 2-way ANOVA with Sidak's correction. **b** Relative renal mRNA expression levels of fibrotic markers (*Col1a1*, *Col1a2*, *Col3a1*, *Fn1*, *Acta2*), kidney injury markers (*Ngal*, *Kim1*), pro-inflammatory markers (*Tnfa*, *Il6*, *Ccl2*, *Ccl5*, *Il1b*), and pEMT markers (*Snai1*, *Zeb*) for experiments shown in Schematic Fig. 9a (NaHCO<sub>3</sub> (n=5), FA FA+IgG/X203 (W15) (n=9/group)). Data are shown as box-and-whisker with median (middle line), 25th–75th percentiles (box), and minimum-maximum values (whiskers), one-way ANOVA with Tukey's correction (except for *Zeb* which was analyzed by Kruskal-Wallis with Dunn's correction). Source data are provided as a Source Data file.

**Supplementary Table 1: SYBR primer sequences for qPCR**

| <b>Host</b>  | <b>Gene</b>          | <b>Forward (5'-3')</b> | <b>Reverse (5'-3')</b>     |
|--------------|----------------------|------------------------|----------------------------|
| <b>Mouse</b> | <b><i>Acta2</i></b>  | TCCATCGTCCACCGCAAAT    | GCCAGGGCTACAAGTTAAGG       |
|              | <b><i>Ccl2</i></b>   | GAAGGAATGGGTCCAGACAT   | ACGGGTCAACTTCACATTCA       |
|              | <b><i>Ccl5</i></b>   | GCTGCTTTGCCTACCTCTCC   | TCGAGTGACAAACACGACTGC      |
|              | <b><i>Col1a1</i></b> | GAGCAGACGGGAGTTTCTCCT  | CATGTAGACTCTTTGCGGCTG      |
|              | <b><i>Col1a2</i></b> | AGGATTGGTCAGAGCAGTGT   | TCCACAACAGGTGTCAGGGT       |
|              | <b><i>Col3a1</i></b> | CCACCCAATACAGGTCAAATGC | TGAGTATGACCGTTGCTCTGC      |
|              | <b><i>Gapdh</i></b>  | CTGGAAAGCTGTGGCGTGAT   | GACGGACACATTGGGGGTAG       |
|              | <b><i>Il1β</i></b>   | CACAGCAGCACATCAACAAG   | GTGCTCATGTCCTCATCCTG       |
|              | <b><i>Kim1</i></b>   | AAACCAGAGATTCCCACACG   | GTCGTGGGTCTTCCTGTAGC       |
|              | <b><i>Ngal</i></b>   | TGGCCCTGAGTGTCATGTG    | CTCTTGAGCTCATAGATGGTG<br>C |
|              | <b><i>Tnfa</i></b>   | ATGAGAAGTTCCCAAATGGC   | CTCCACTTGGTGGTTTGCTA       |
|              | <b><i>Snai1</i></b>  | CACACGCTGCCTTGTGTCT    | GGTCAGCAAAAGCACGGTT        |
|              | <b><i>Zeb</i></b>    | GCTGGCAAGACAACGTGAAAG  | GCCTCAGGATAAATGACGGC       |
| <b>Human</b> | <b><i>DUSP5</i></b>  | GCCAGCTTATGACCAGGGTG   | GTCCGTCGGGAGACATTGAG       |

# Uncropped blots for supplementary figures

## Supplementary Figure 4g

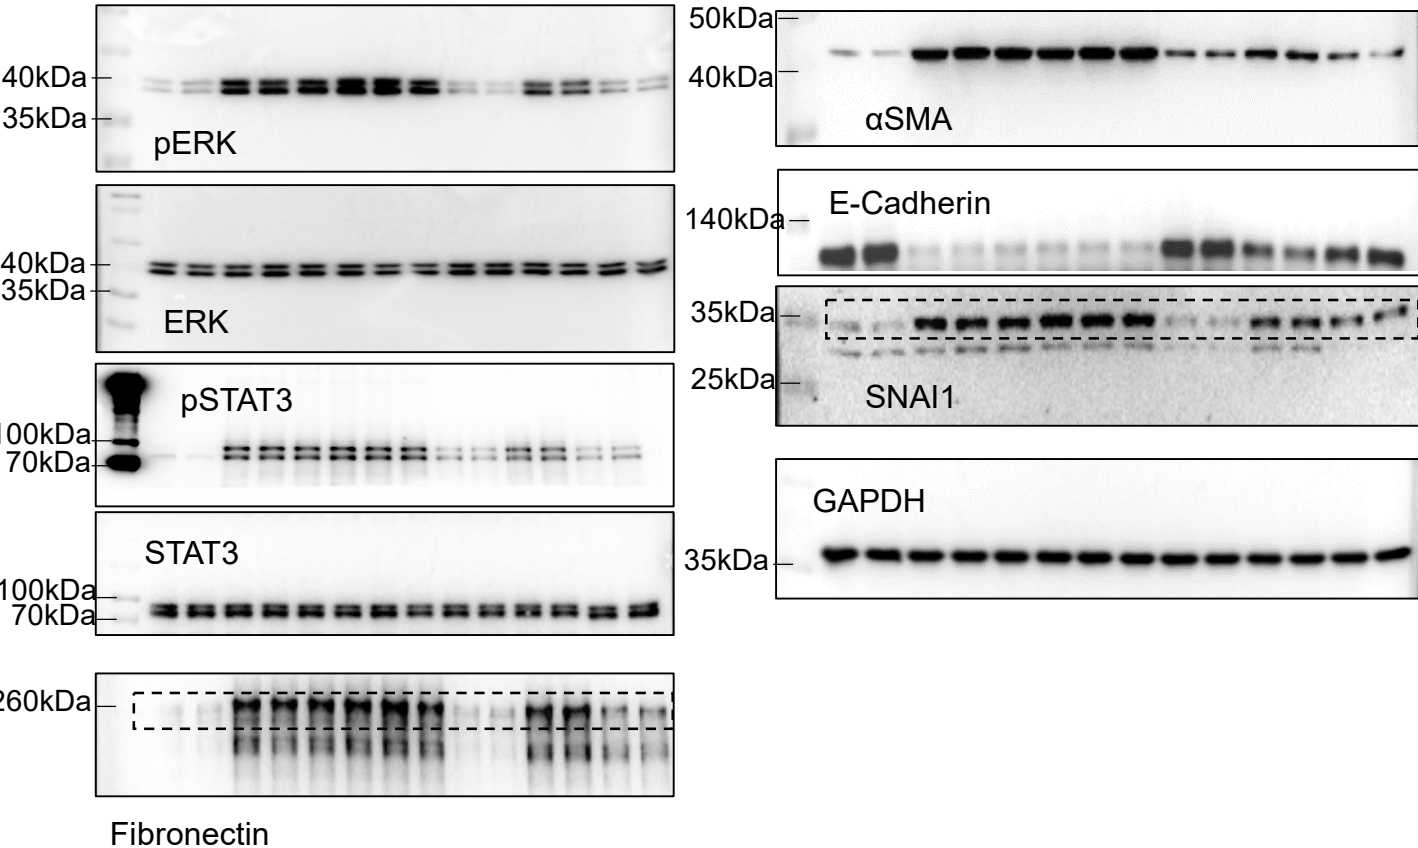

# Supplementary Figure 7c

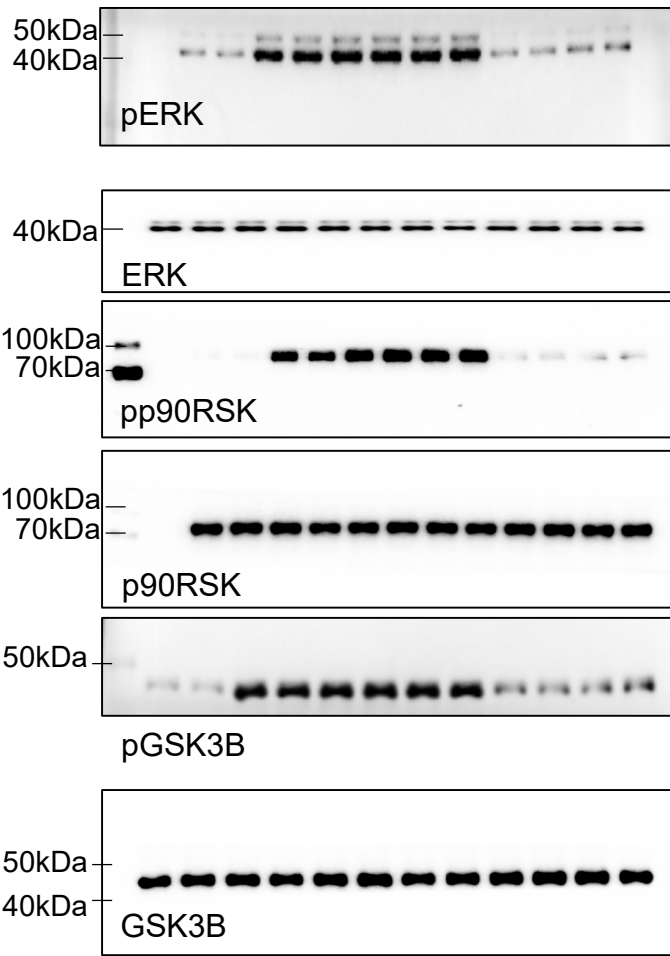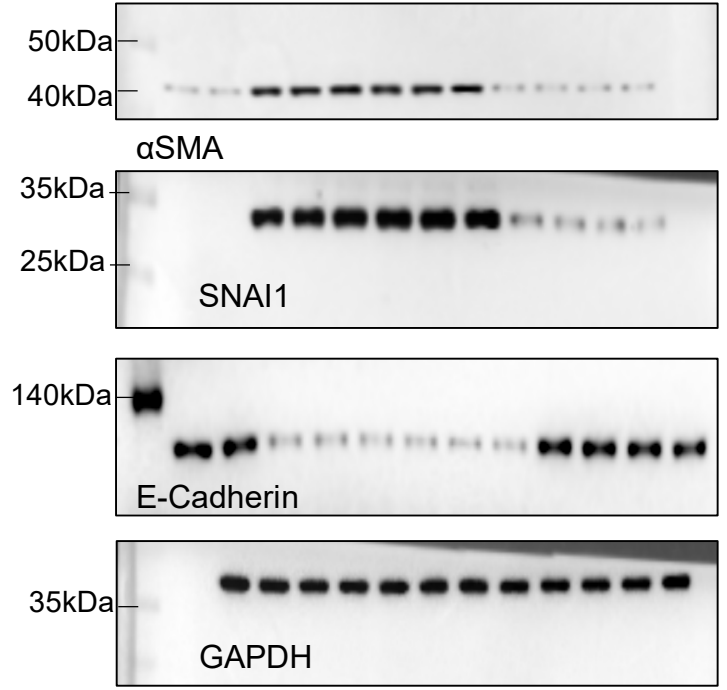

# Supplementary Figure 7d

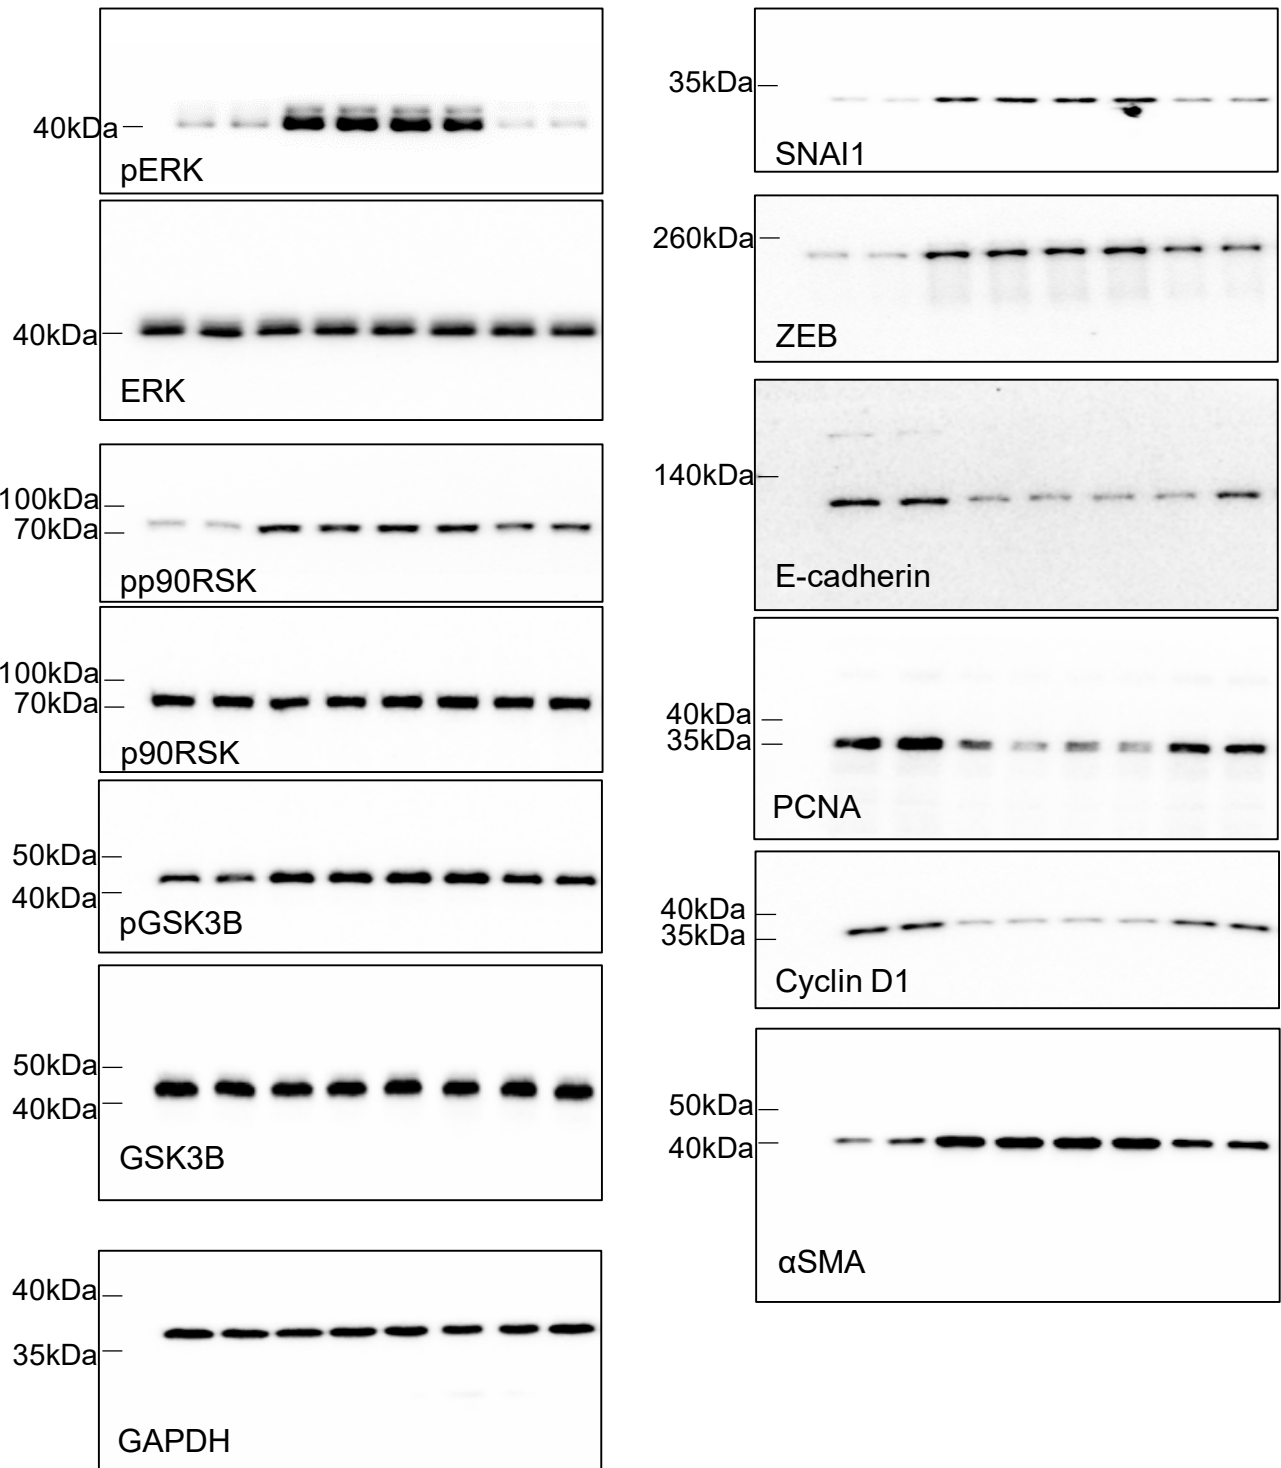

# Supplementary 8e

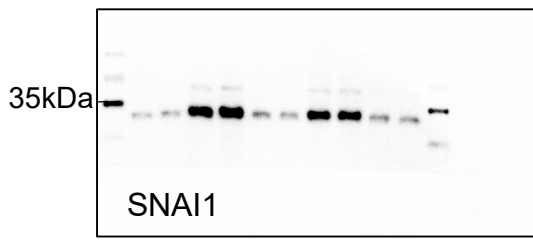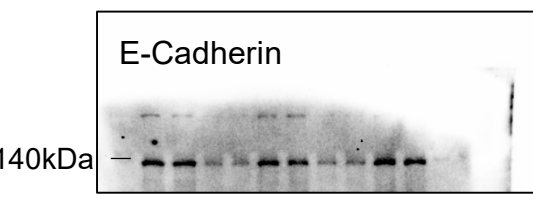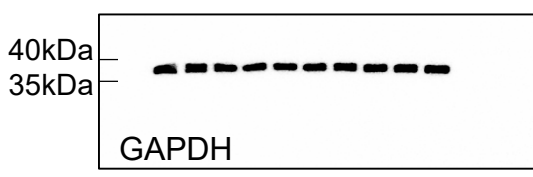

Supplement: 41467_2022_35306_MOESM1_ESM.pdf [file 41467_2022_35306_MOESM1_ESM.pdf]
