# Supplementary material for: Targeting endogenous kidney regeneration using anti-IL11 therapy in acute and chronic models of kidney disease
Source: PubMed Central journal article supplement (PMC9723120; doi:10.1038/s41467-022-35306-1), 2022-12-05
Supplement: 41467_2022_35306_MOESM6_ESM.pdf [file 41467_2022_35306_MOESM6_ESM.pdf]

**Title:** Supplementary Data 1:

**Description:** List of differentially expressed genes in primary human tubular epithelial cells (TEC) stimulated with IL11 for 1, 6, and 24 h as compared to unstimulated TECs. Differential expression analysis is carried out using Wald test in DESeq2 and p-values adjusted using Benjamini & Hochberg method.

**Title:** Supplementary Data 2:

**Description:** Supporting statistical information.
